# Supplementary material
Source: PubMed Central journal article supplement (PMC3248798)

# Supplementary Figure 1

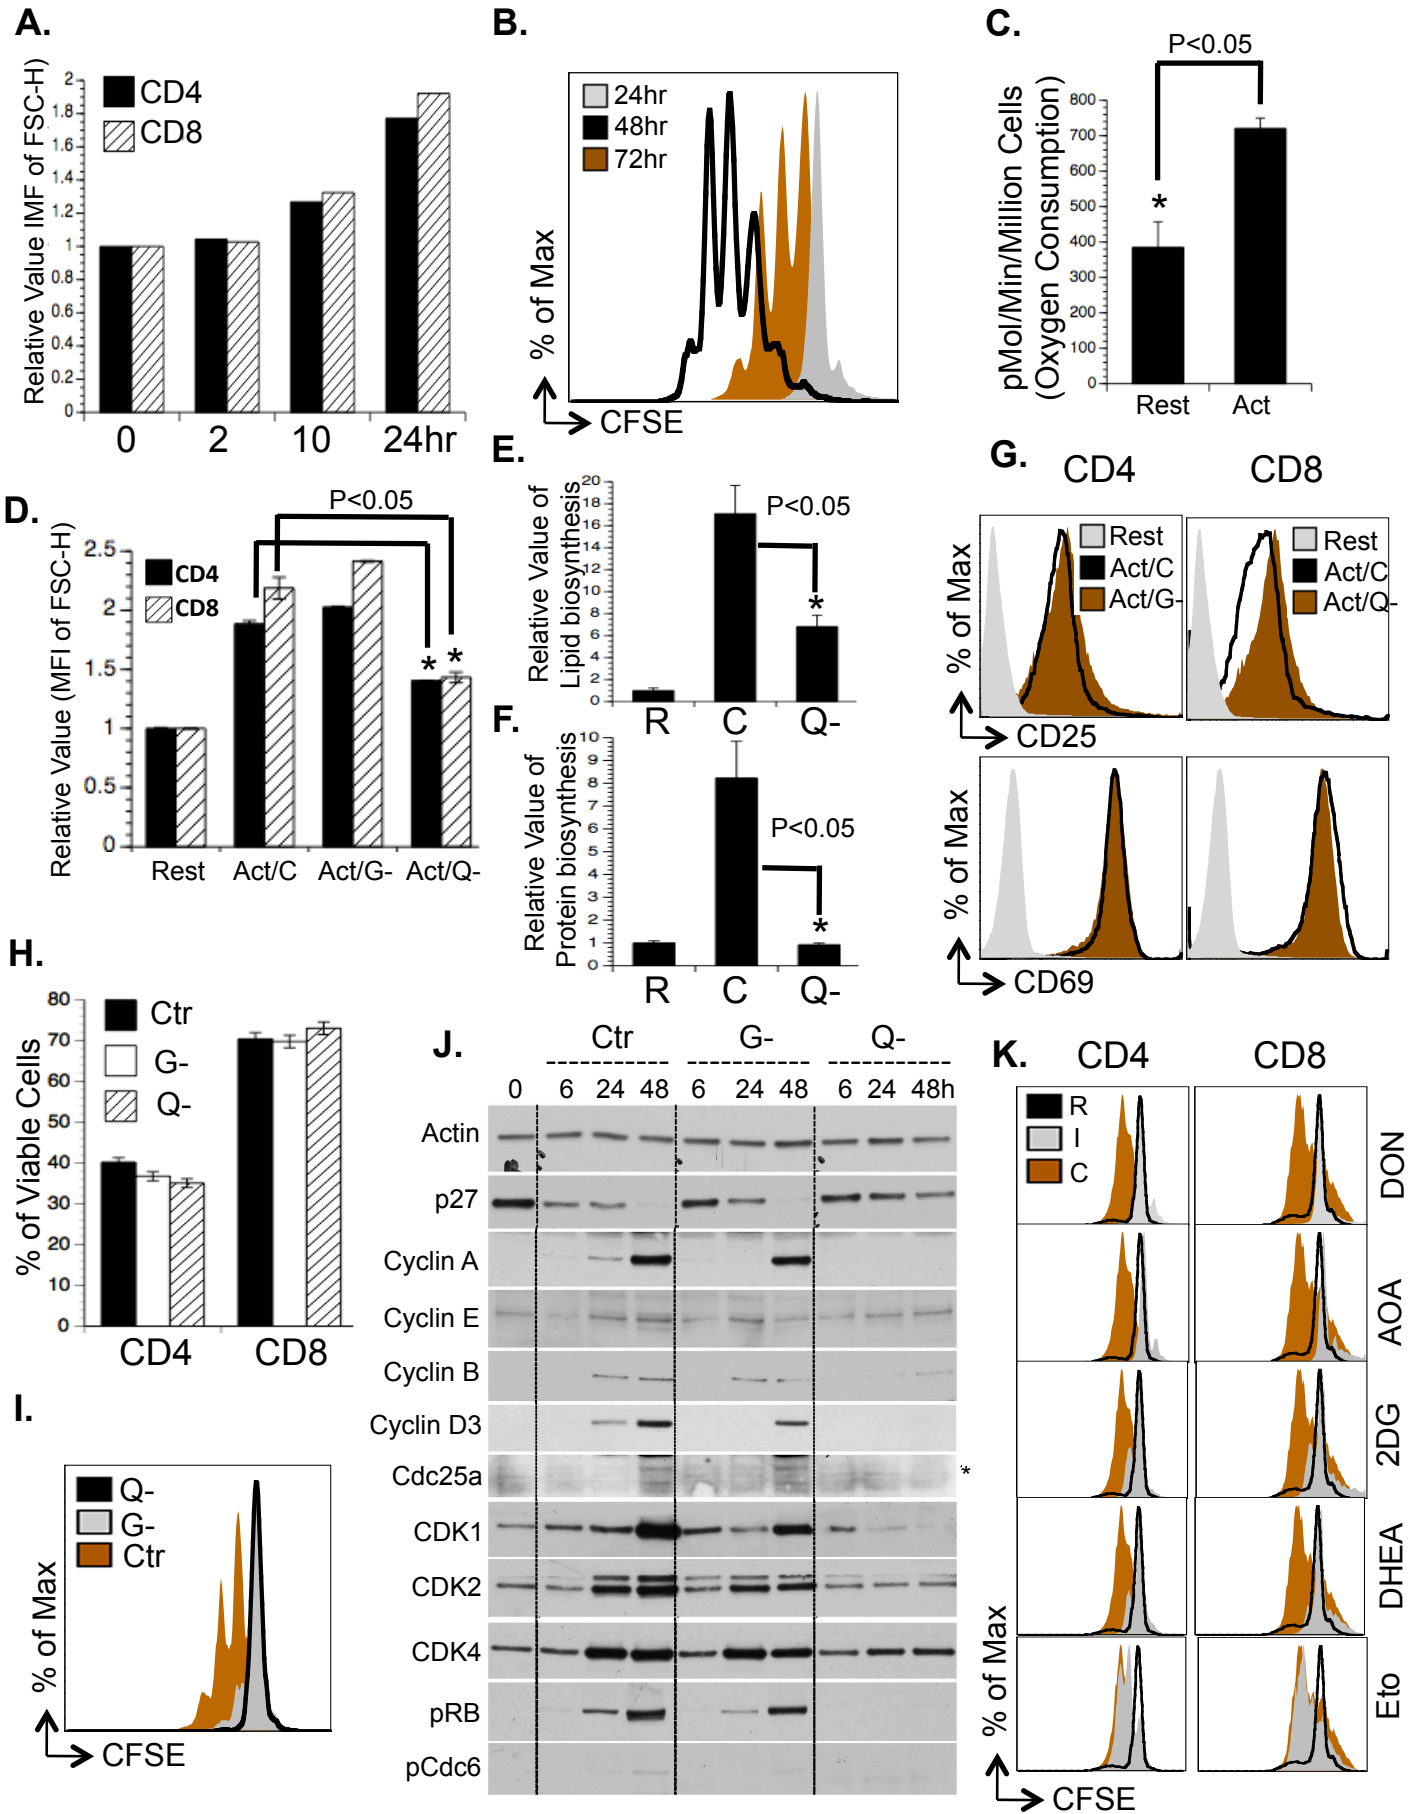

# Supplementary Figure 2

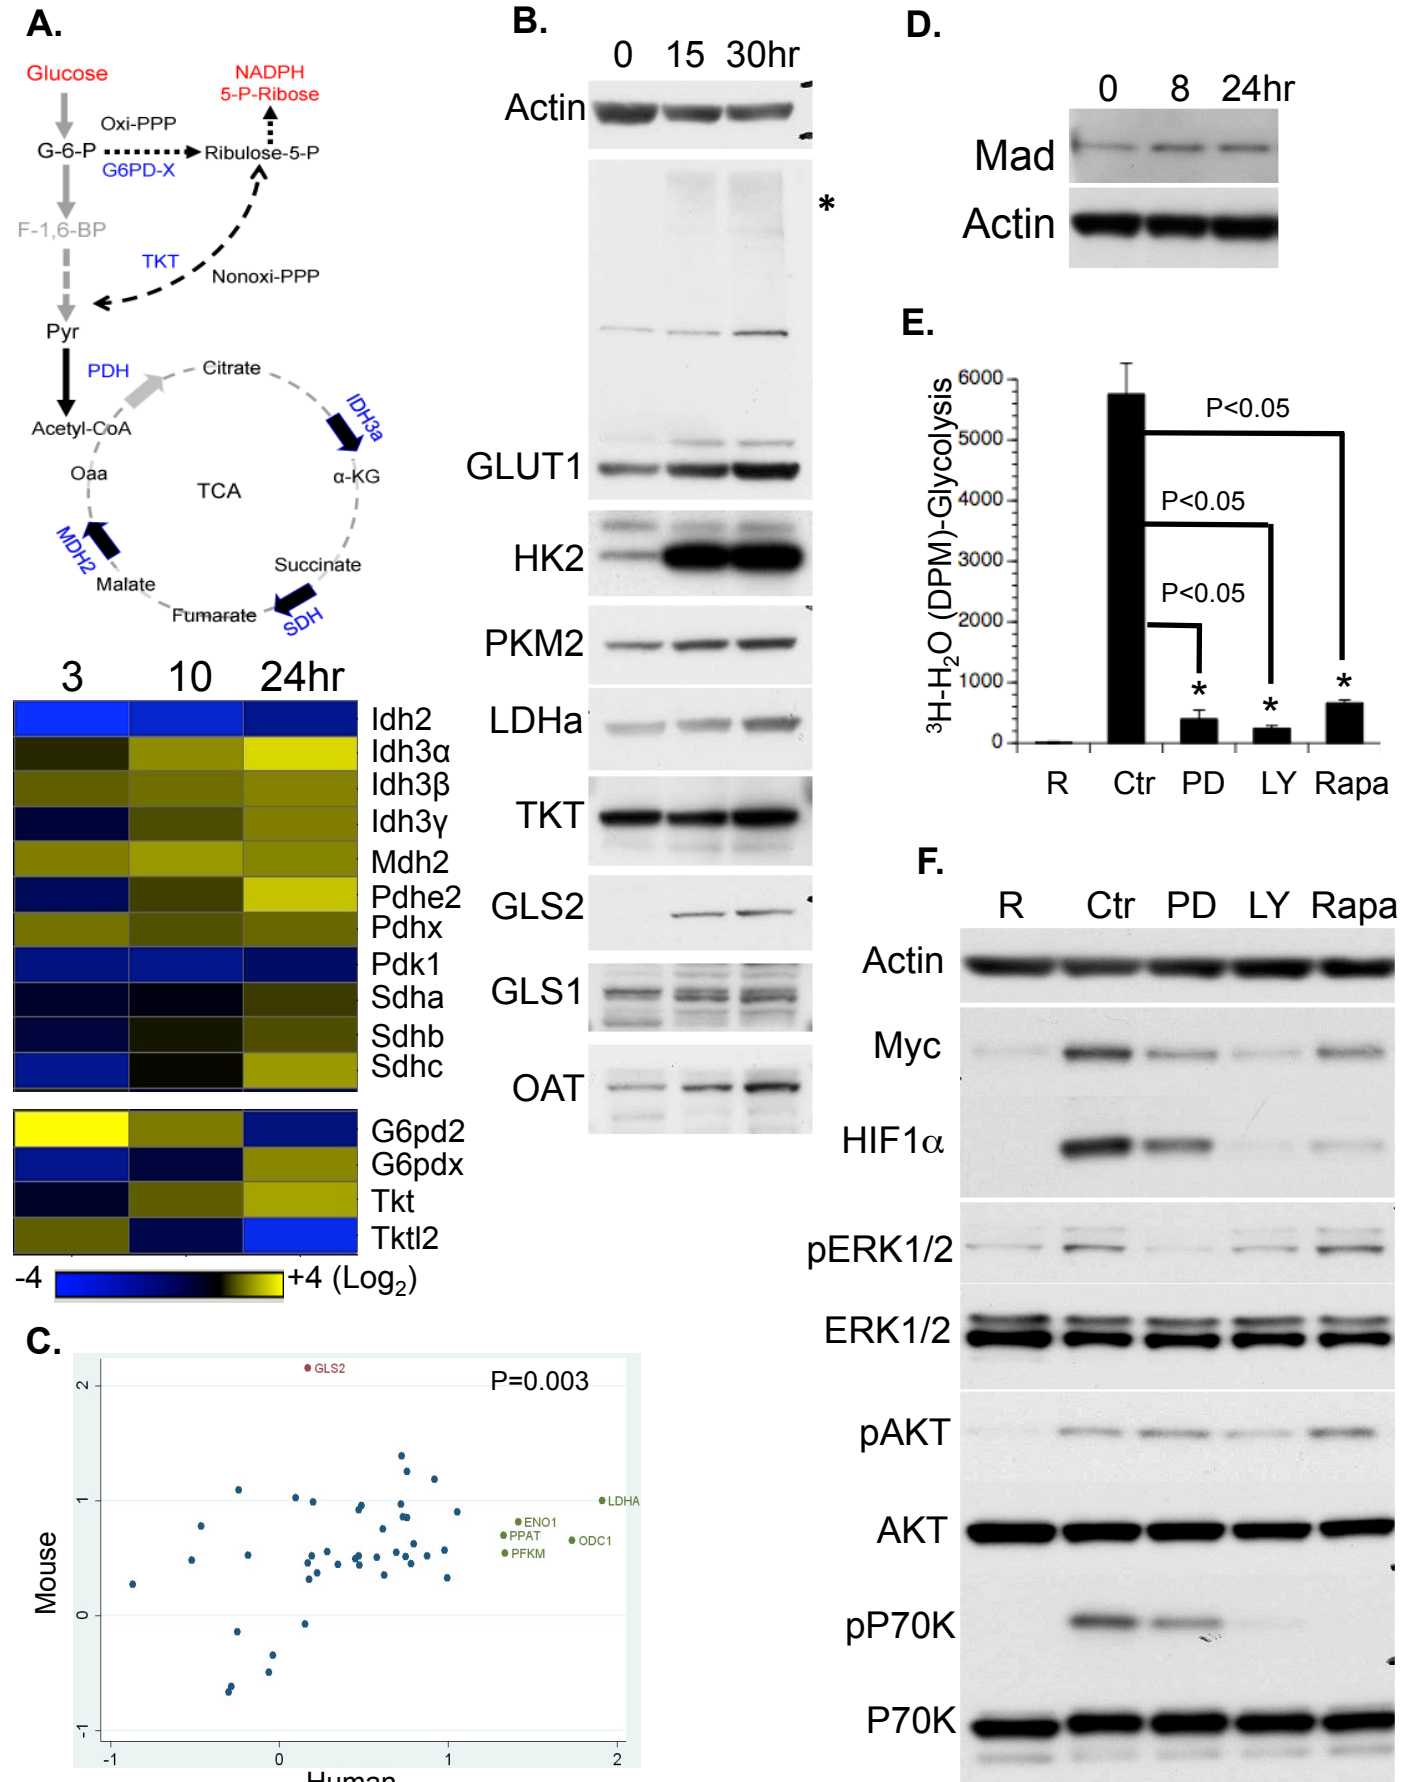

# Supplementary Figure 3

**A.**

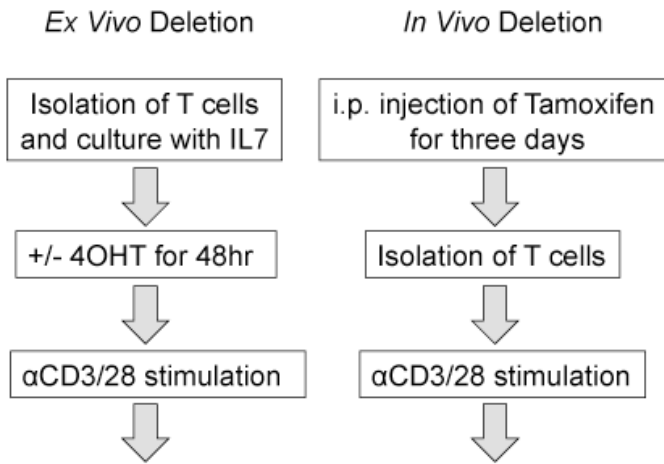

1. Metabolic assays, cell size and activation markers 24hr after activation
2. Cell proliferation 48hr after activation.

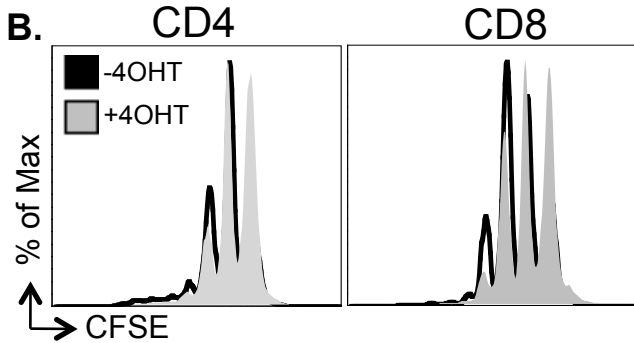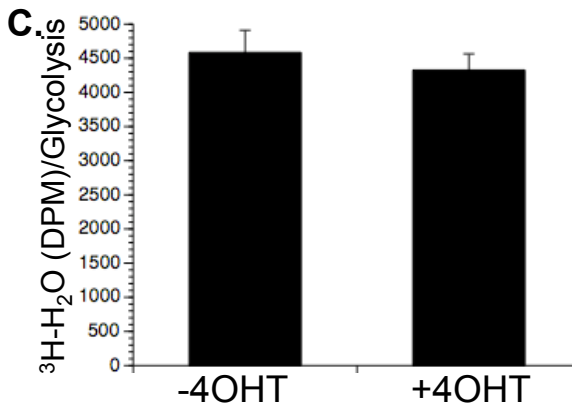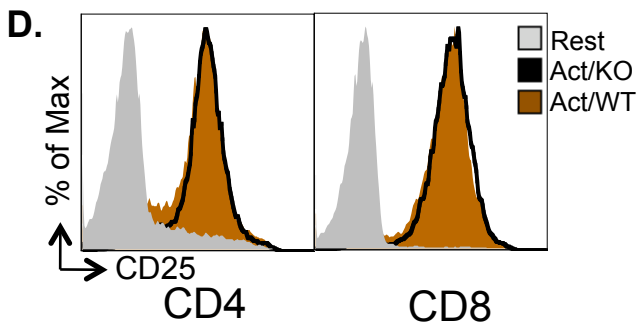

**E.**

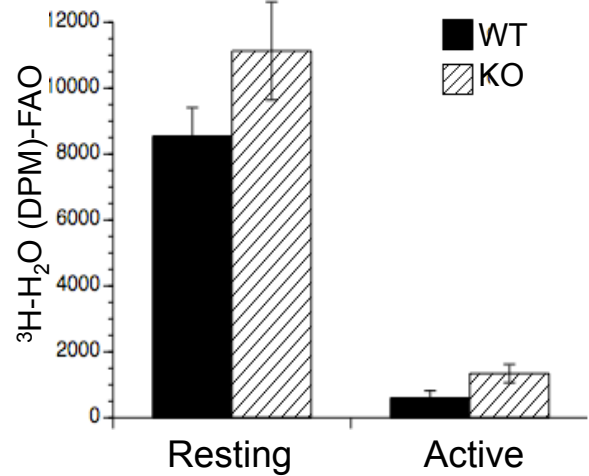

**F.**

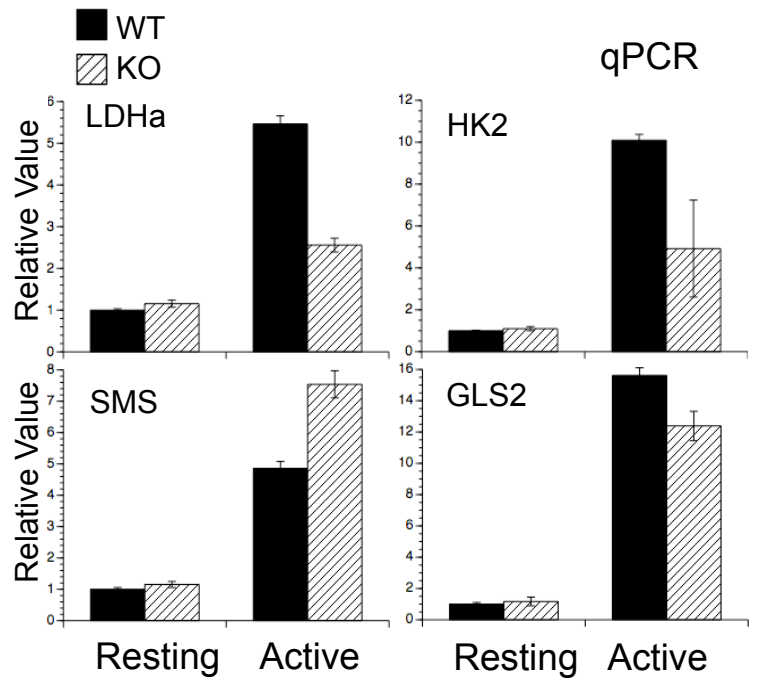

**G.**

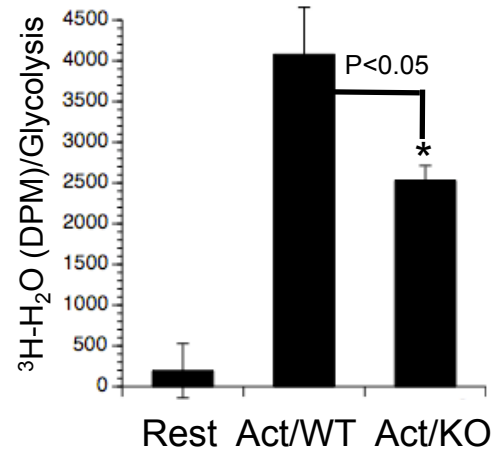

# Supplementary Figure 4

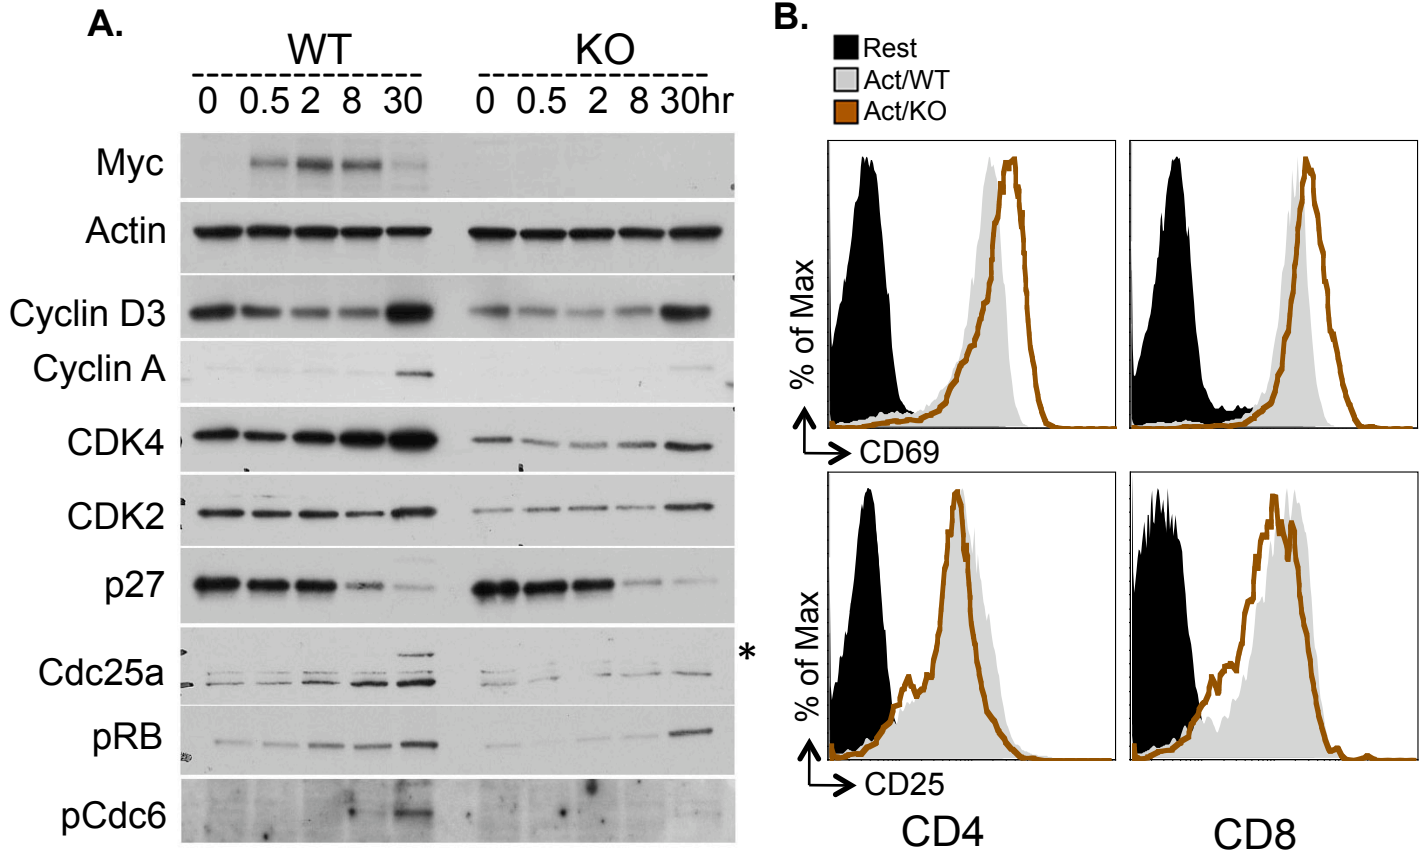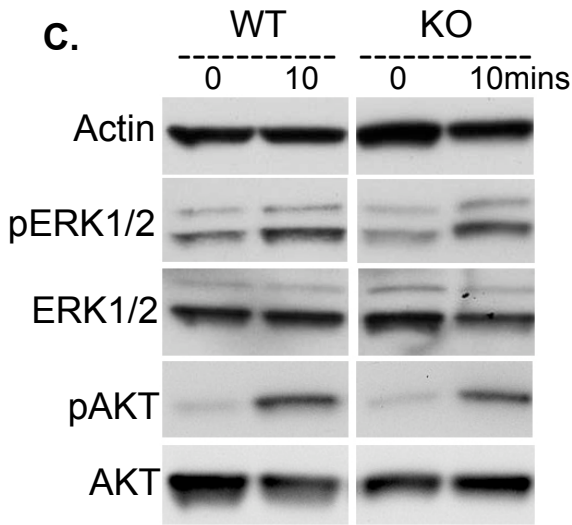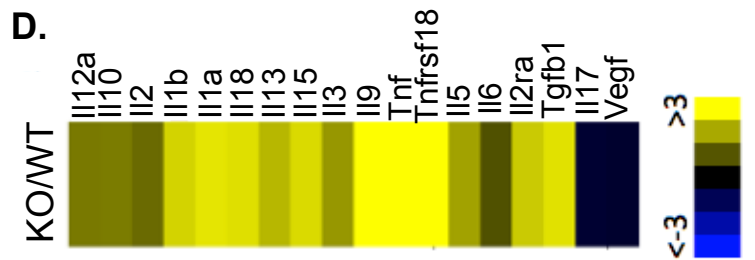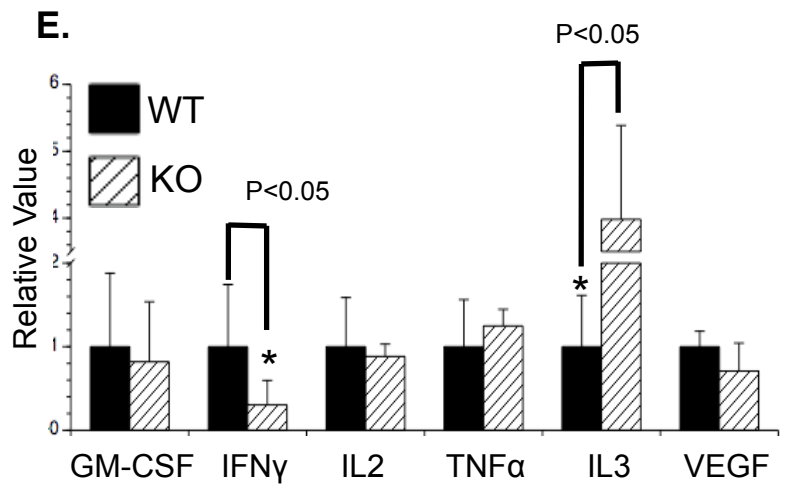

# Supplementary Figure 5

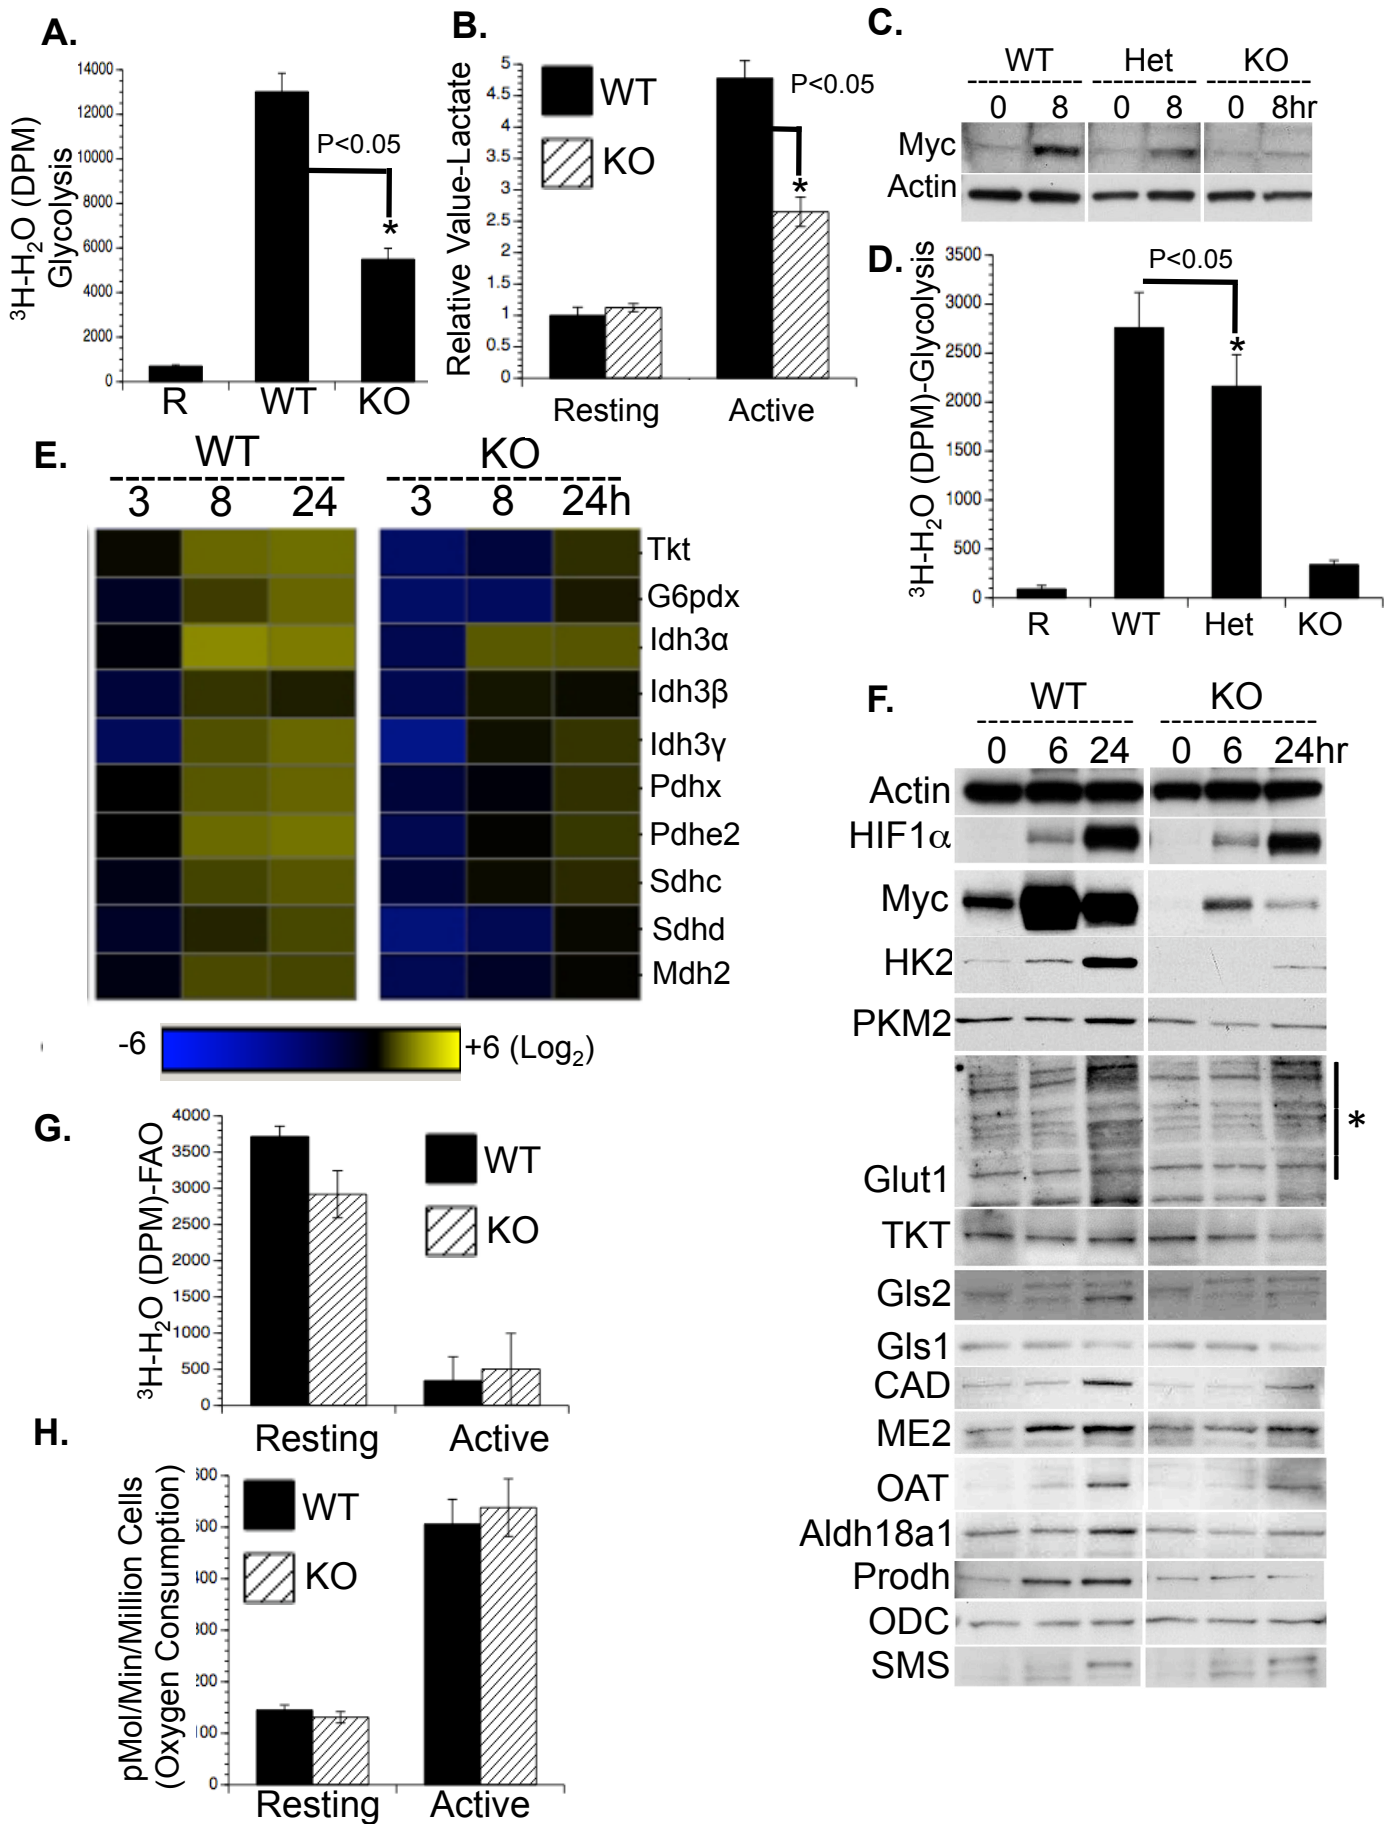

## Supplementary Figure 6

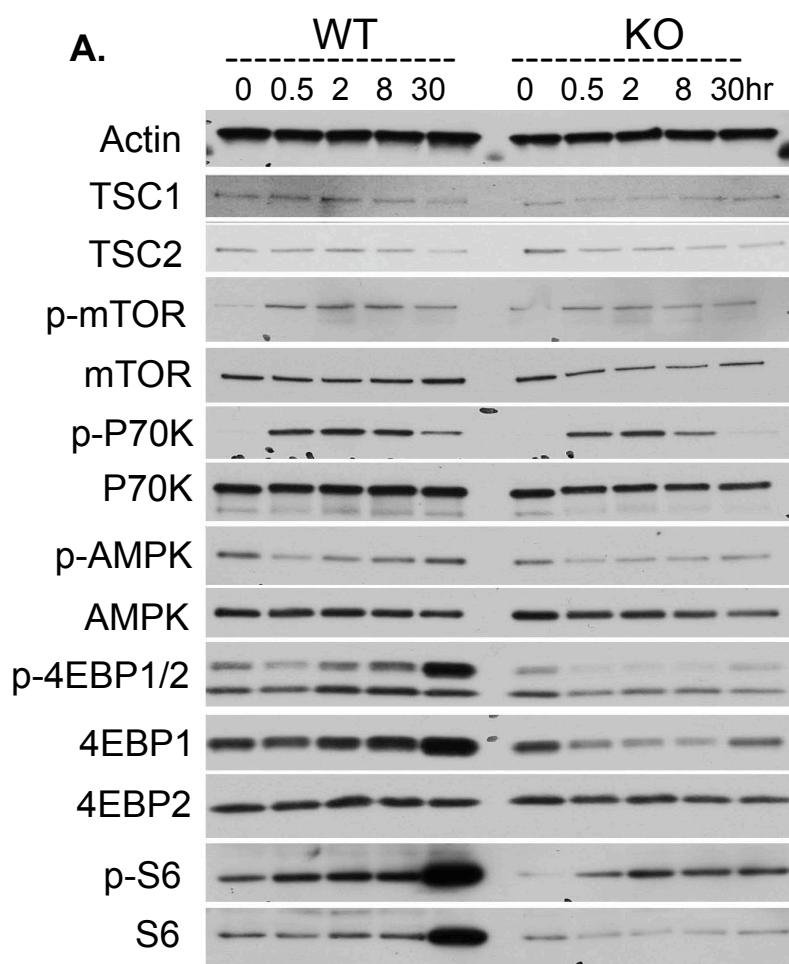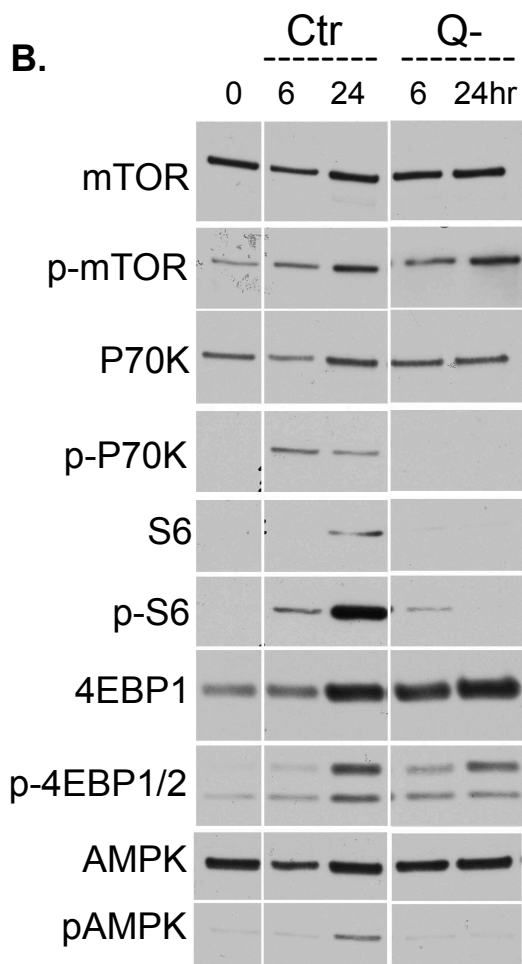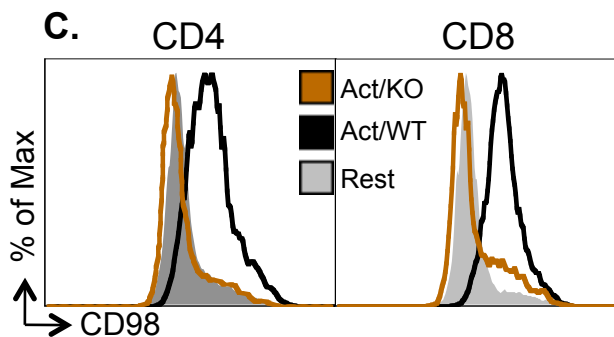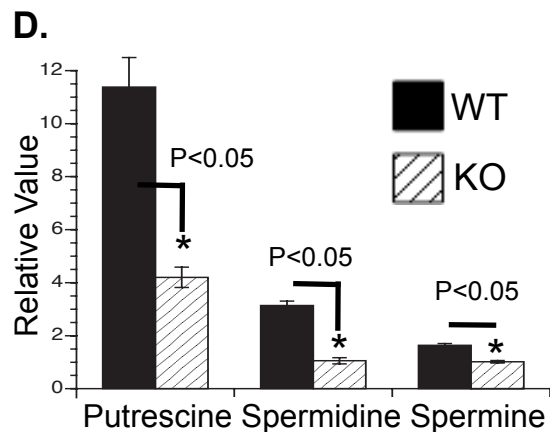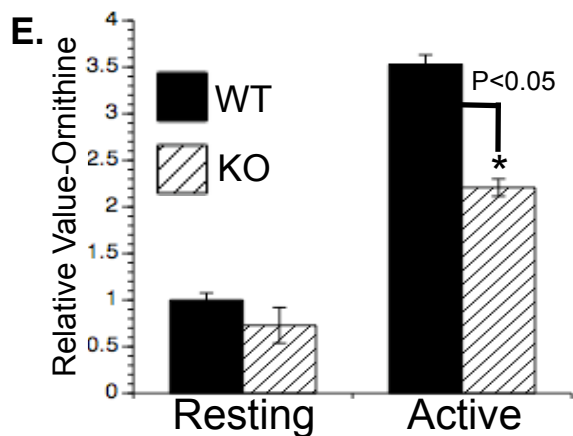

# Supplementary Figure 7

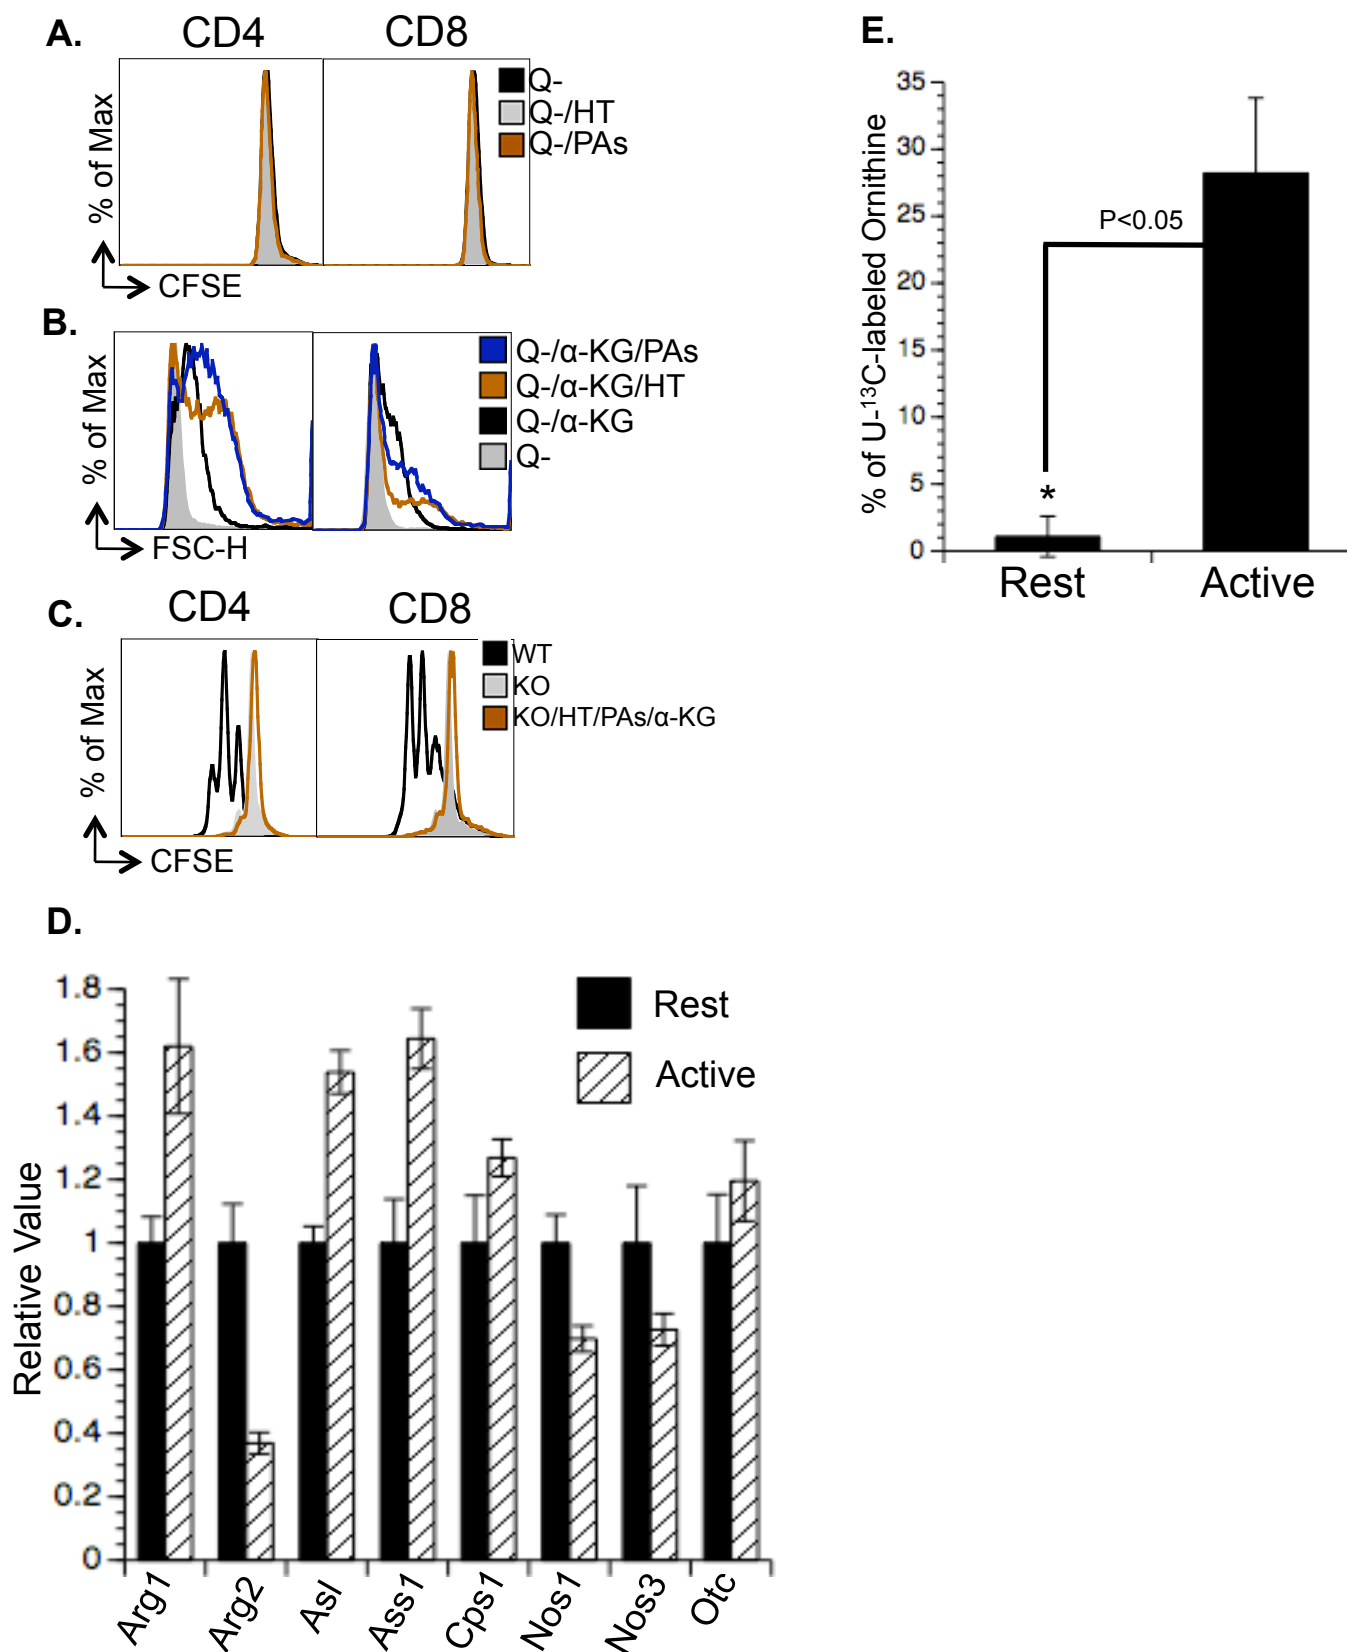

Supplement: NIHMS345587-supplement-08.pdf [file NIHMS345587-supplement-08.pdf]
